# Supplementary figures and images for: Phenolic Profiles, Antioxidant, and Hypoglycemic Activities of Ribes meyeri Fruits
Source: MDPI journal article supplement (doi:10.3390/foods12122406), 2023-06-18

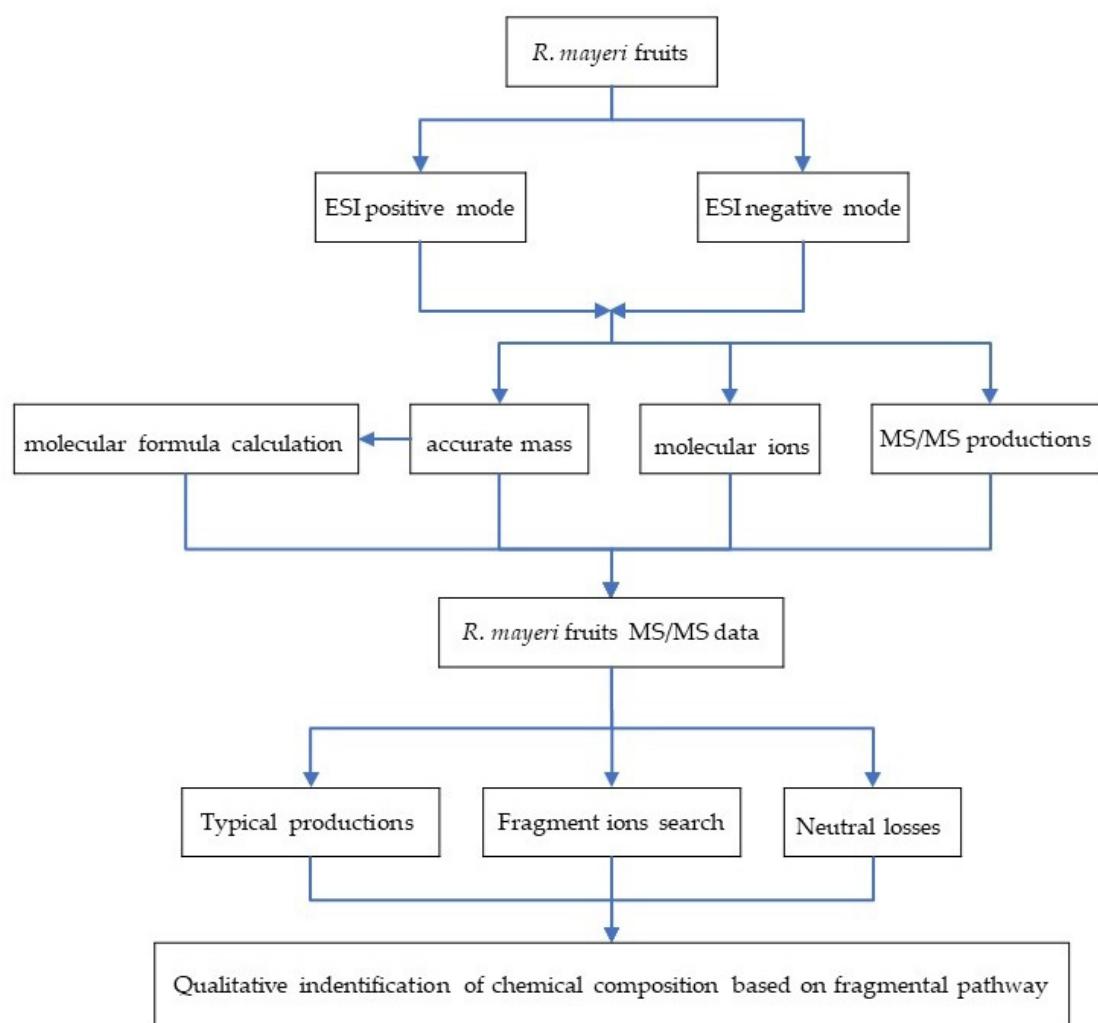

**Figure S1.** Compound identification scheme of the research methods.

Supplement: s1 [file s1]
